# Supplementary material for: New particle formation in the fresh flue gas plume increase the effective particle number emissions of a coal-fired power plant
Source: Copernicus journal article supplement (doi:10.5194/acp-2015-990), 2016-02-05
Supplement: Supplementary file 1 [file acp-2015-990-supplement.pdf]

## Supplementary Information 1

Table SI1. Coal properties

|               |       | Coal        |
|---------------|-------|-------------|
| Moisture      | %     | 11.0 - 11.3 |
| Ash           | %     | 10.5 - 11.4 |
| Volatiles     | %     | 32.8 - 33.1 |
| Sulphur       | %     | 0.27 - 0.41 |
| Heating Value | GJ/t  | 24.6 - 24.9 |
| Coal          | %     | 62.3 - 63.1 |
| Hydrogen      | %     | 4.1 - 4.2   |
| Nitrogen      | %     | 1.8 - 2     |
| Oxygen        | %     | -           |
| Chlorides     | mg/kg | 76 - 236    |

## Supplementary Information 2

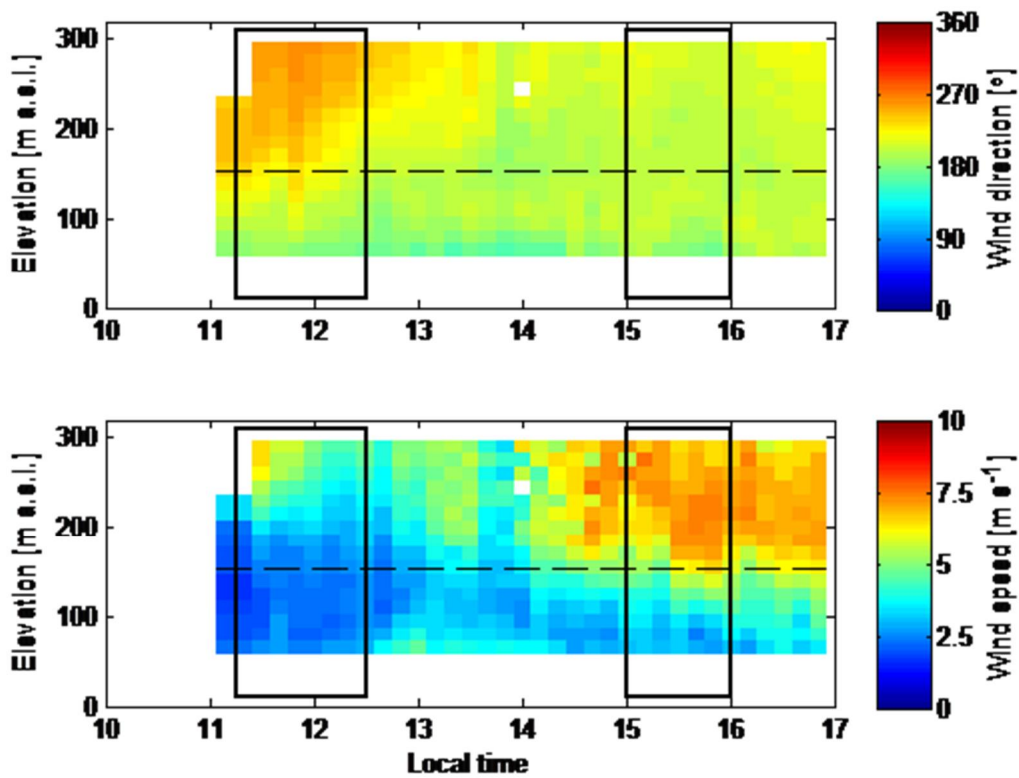

LIDAR Measurements from the studied time period, local time is UTC +2. The rectangles present the flight times and the dashed line shows the stack height.

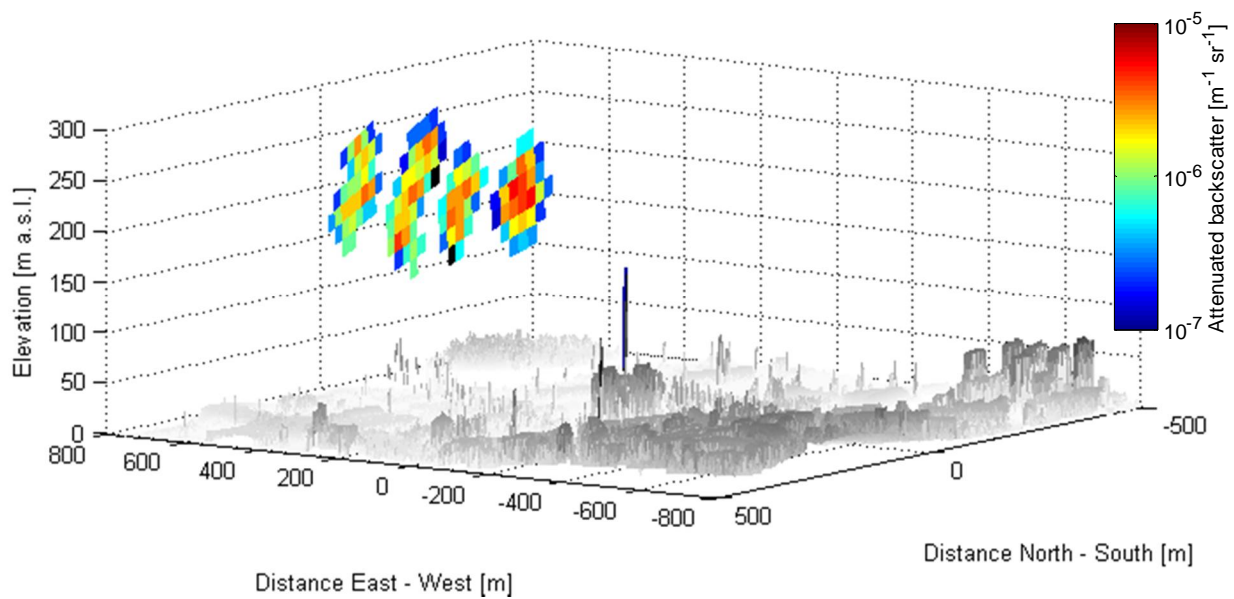

LIDAR data from 14:43 from the measurement day, the stack is at the middle and wind is blowing 180 ° angle.

---

Supplementary Information 3

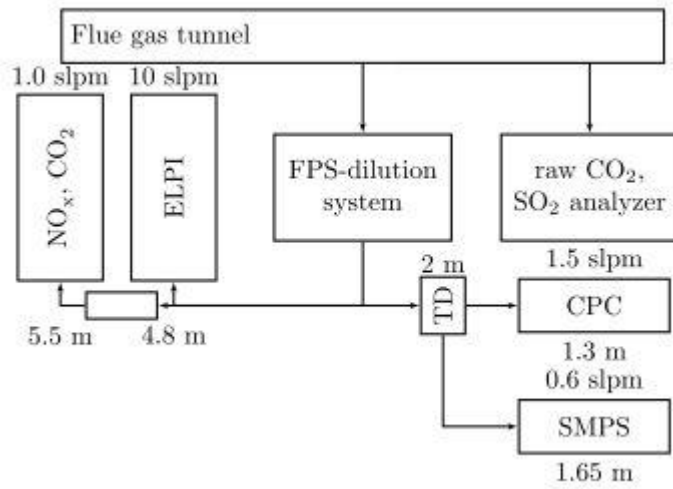

Fig S1. (a) Instrument installation at stack

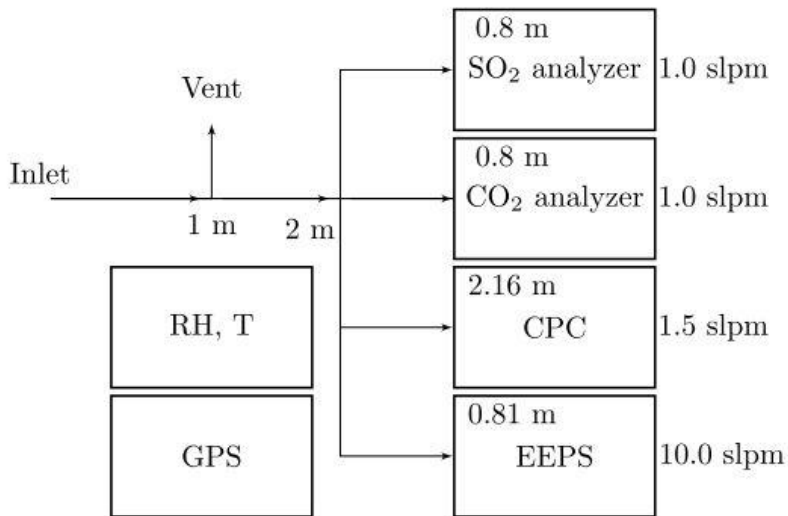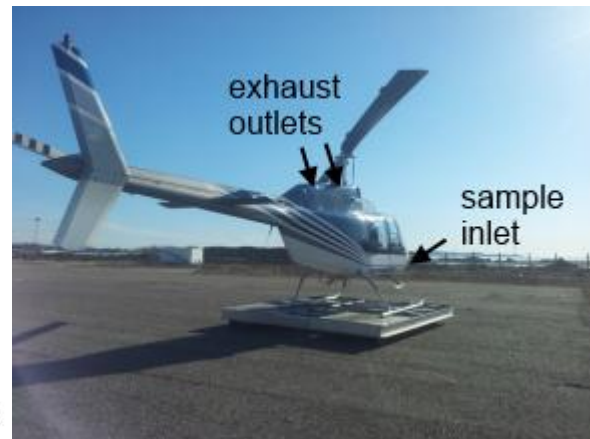

Fig S1. (b) Instrument installation in the helicopter and figure of the helicopter (sample inlet and exhaust outlets shown).
